# Supplementary figures and images for: Functional specialization within the inferior parietal lobes across cognitive domains
Source: eLife journal article supplement (doi:10.7554/elife.63591), 2021-03-02

# Hemispheric Symmetry

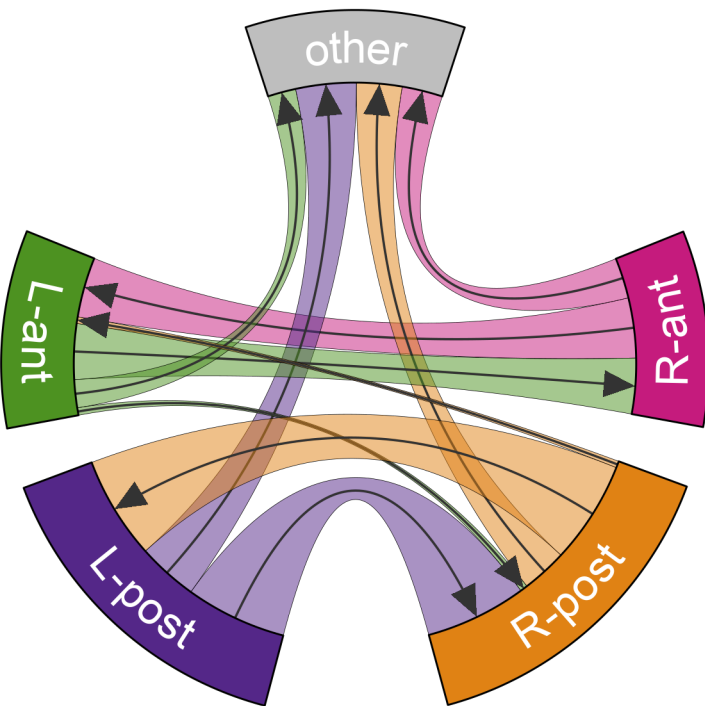

Supplement: supp [file elife-63591-supp-v1.zip]

# Subregion-specific functional connectivity

## Attention

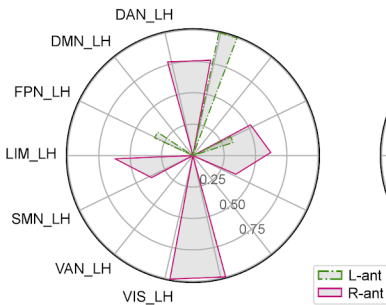

## Semantics

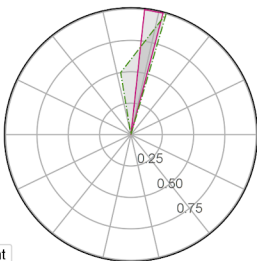

## Social Cognition

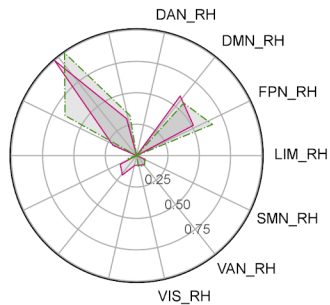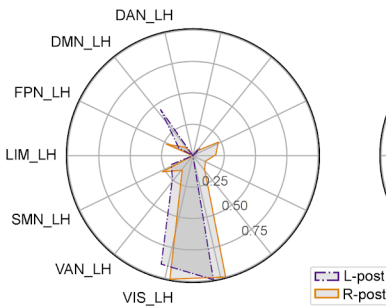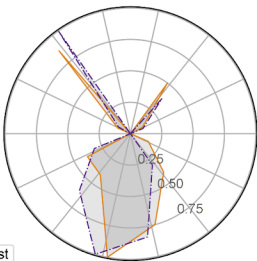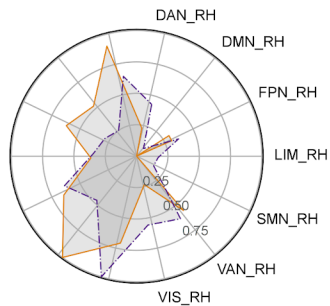

Supplement: supp [file elife-63591-supp-v1.zip]
